# Supplementary material
Source: PubMed Central journal article supplement (PMC7446722)
Supplement: mmc1.pdf [file mmc1.pdf]

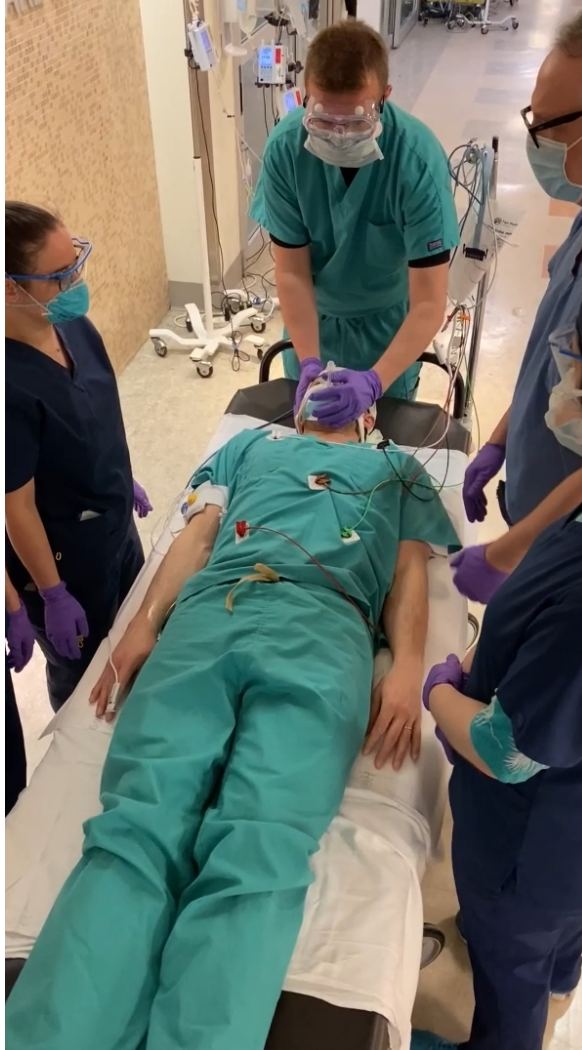

**Supplemental Image S1a: Positioning from Supine to Prone**

**Step 1:**

Position staff:

- Two staff on either side of bed
- Respiratory therapist (RT) or provider at head of bed

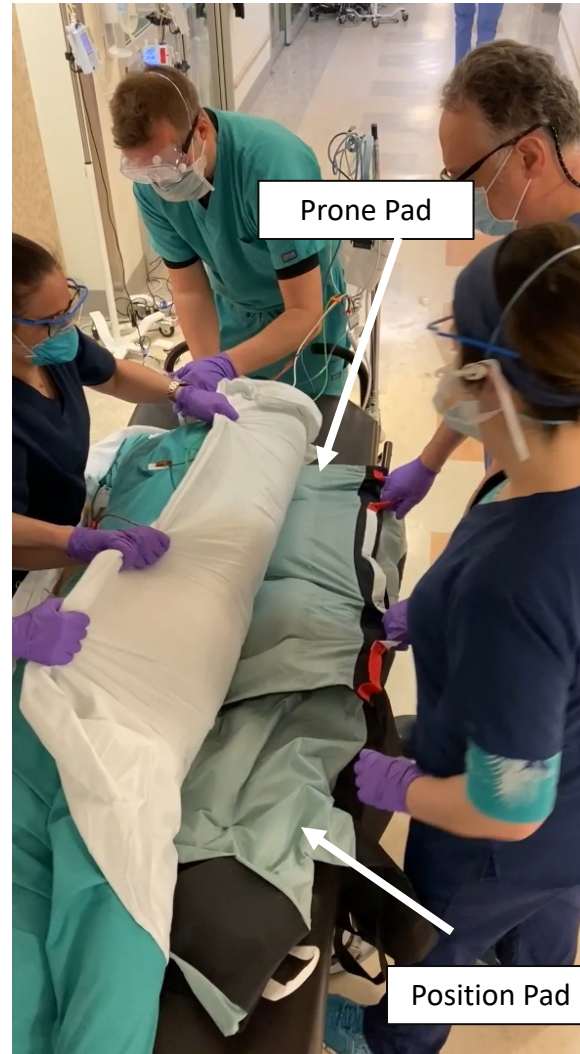

**Supplemental Image S1b: Positioning from Supine to Prone**

**Step 2:**

- Place positioning pad underneath draw sheet centered at patient's shoulder level.
- Place prone pad on top of positioning pad and underneath draw sheet.

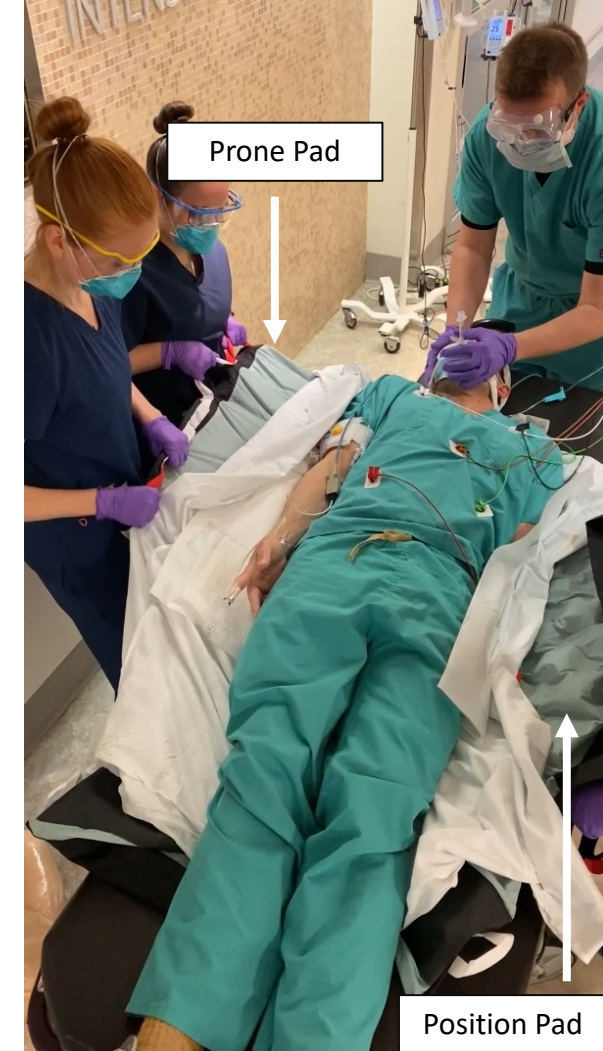

**Supplemental Image S1c: Positioning from Supine to Prone**

**Step 3:**

- RT confirms endotracheal tube is secure
- Staff on one side of bed pull prone pad towards their side while staff on opposite side of bed hold positioning pad in place.
- The patient will move with the prone pad to the edge of the bed.



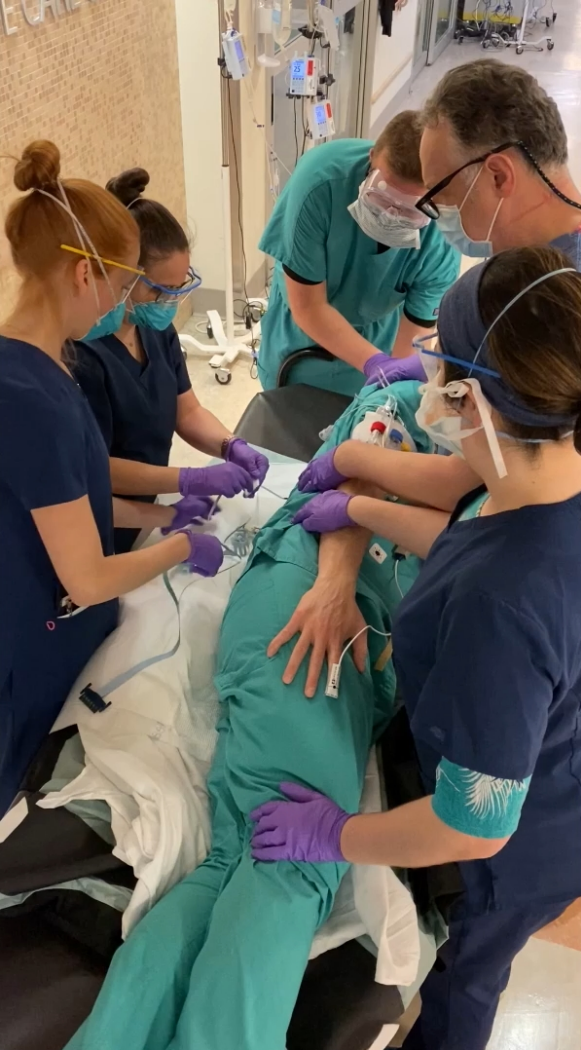

**Supplemental Image S1d: Positioning from Supine to Prone**

**Step 4:**

- Using prone pad, turn patient holding patient at half-way point (both back and chest exposed).
- Attach EKG leads on back.
- Put prone pad and old draw sheet aside.

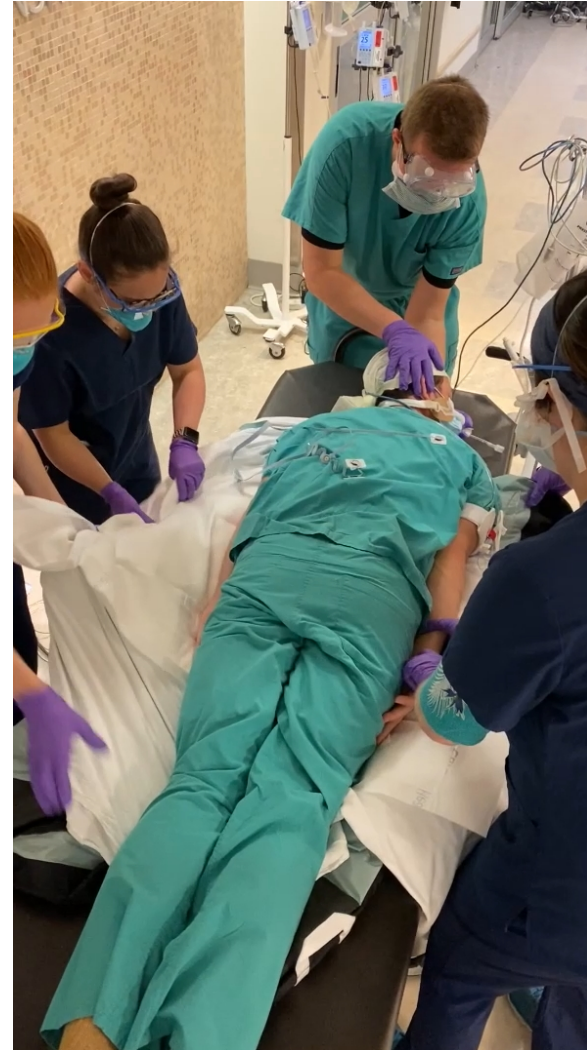

**Supplemental Image S1e: Positioning from Supine to Prone**

**Step 5:**

- Pull position pad to assist in completely turning patient to prone position.
- Ensure neck is not hyperextended (consider placing bed in reverse Trendelenburg if this helps avoid neck hyperextension).

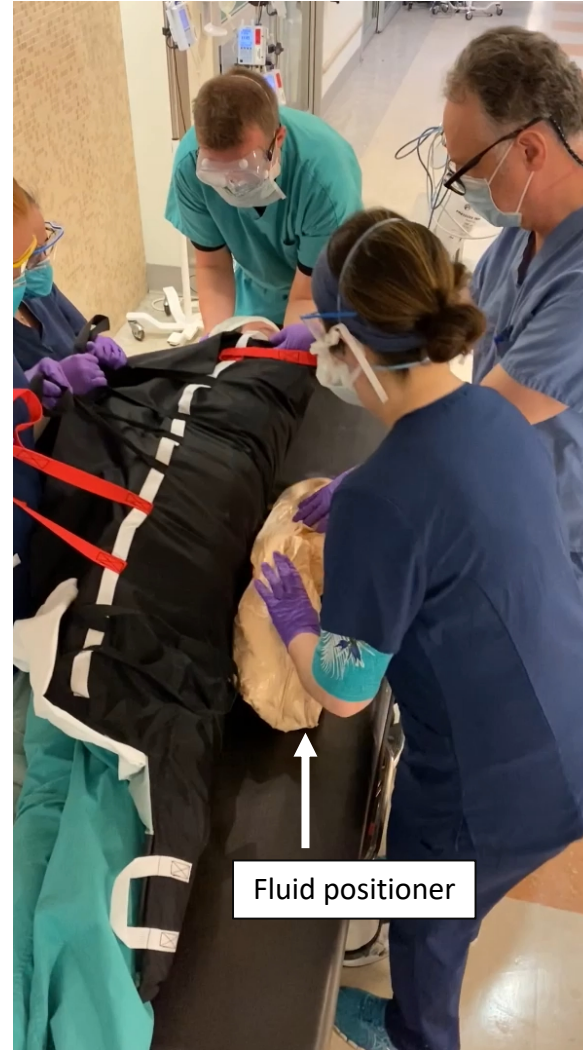

**Supplemental Image S1f: Positioning from Supine to Prone**

**Step 6:**

- Place one fluid positioner (FP) from shoulder to hip underneath positioning pad and other FP under head.

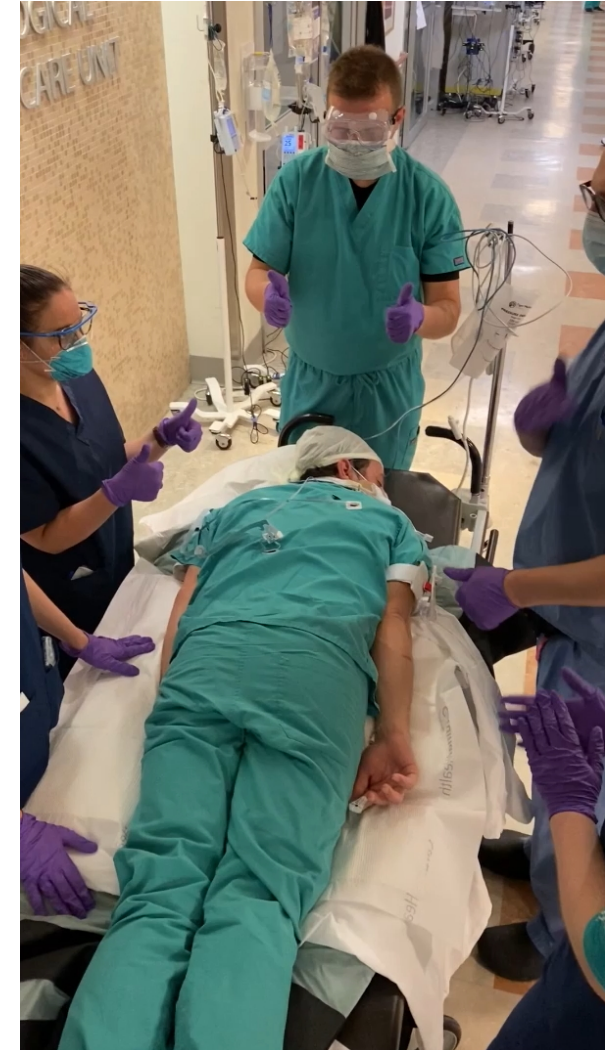

**Supplemental Image S1h: Positioning from Prone to Supine**

- Place prone pad on top of positioning pad and underneath draw sheet. Repeat Step 3. Pull prone pad exposing spine picture on positioning pad. Place new draw sheet on top of prone pad. Repeat Step 4 but place EKG leads on chest. Repeat Step 5.
